# Supplementary material for: Utilization of Natural History Information in Evidence based Herpetoculture: A Proposed Protocol and Case Study with Hydrodynastes gigas (False Water Cobra)
Source: PubMed Central journal article supplement (PMC7693199; doi:10.3390/ani10112021), 2020-11-03
Supplement: animals-10-02021-s001.pdf [file animals-10-02021-s001.pdf]

## Husbandry Attribute

- a. Enclosure type
- b. Enclosure dimensions (L - W - H for adult)
- b. Substrate type
- c. Thermal needs - maintenance
- d. Enclosure furniture type/amount
- e. Light needs (UVB level; bulb type; etc.)
- e. Light cycle needs

- a. Food items
- b. Feeding frequency
- c. Requirements for "normal" growth

- a. Space requirements
- b. Hide availability
- c. Thermal gradient
- d. Seasonal cycling - "Summer" cycle
- e. Seasonal cycling - "Winter" cycle

- a. Space requirements
- b. Privacy requirements
- c. Methods for welfare assessment
- d. Enrichment possibilities

- a. Seasonal cycling needed?
- b. Incubation temperatures and duration?
- c. Feeding regime pre-mating
- d. Care of neonates - ontogeny

**Sources = J = journal article; B = book/monograph; S = social media; W = website.**

## Husbandry Question/Determination

1. What is needed for husbandry space?

|  |
|--|
|  |
|  |
|  |
|  |
|  |
|  |
|  |
|  |

2. What are the physiological needs?

|  |
|--|
|  |
|  |
|  |

3. What is needed to encourage natural behaviors?

|  |
|--|
|  |
|  |
|  |
|  |
|  |

4. What are the welfare needs and concerns?

|  |
|--|
|  |
|  |
|  |
|  |

5. Captive breeding requirements

|  |
|--|
|  |
|  |
|  |
|  |

|  |
|--|
|  |
|--|

## Sources

*Sources = J = journal article; B = book/monograph; S = social media; W = website.*

|  |
|--|
|  |
|  |
|  |
|  |
|  |
|  |
|  |
|  |

|  |
|--|
|  |
|  |
|  |

|  |
|--|
|  |
|  |
|  |
|  |
|  |

|  |
|--|
|  |
|  |
|  |
|  |

|  |
|--|
|  |
|  |
|  |
|  |
